# Supplementary material for: Comparison of the dynamics of Japanese encephalitis virus circulation in sentinel pigs between a rural and a peri-urban setting in Cambodia
Source: PubMed Central journal article supplement (PMC6107123; doi:10.1371/journal.pntd.0006644), 2018-08-23
Supplement: pntd.0006644.s001.pdf [file pntd.0006644.s001.pdf]

**Household ID:** \_\_\_\_\_

**Province:** Kandal Ta Khmau

**GPS coordinates:**

**How many people live in your household?**

Children ( $\leq 15$  years): \_\_\_\_\_

Adults ( $> 15$  years): \_\_\_\_\_

| <b>Animal</b>  | <b>Number of adults (&gt;1 year)</b> | <b>Number of youngs (&lt;1 year)</b> |
|----------------|--------------------------------------|--------------------------------------|
| <b>Dog</b>     |                                      |                                      |
| <b>Cat</b>     |                                      |                                      |
| <b>Pig</b>     |                                      |                                      |
| <b>Chicken</b> |                                      |                                      |
| <b>Duck</b>    |                                      |                                      |
| <b>Cattle</b>  |                                      |                                      |
| <b>Other</b>   |                                      |                                      |

**If you possess pigs, what type of farm do you have?**

Farrowing or  Fattening or  Farrow-to-finish or  Backyard

**Combien de portées de n porcs en moyenne naissent ou sont engraisées par an?**

\_\_\_\_\_ litters of \_\_\_\_\_ pigs born per year ; \_\_\_\_\_ litters of \_\_\_\_\_ pigs fattened per year

**If you breed chickens, how many chicks are born every month?**

\_\_\_\_\_ chicks per month

**Did you breed pigs last year? If yes, how many?**

\_\_\_\_\_ Adults          \_\_\_\_\_ Young
