# Supplementary material for: Comparison of the dynamics of Japanese encephalitis virus circulation in sentinel pigs between a rural and a peri-urban setting in Cambodia
Source: PubMed Central journal article supplement (PMC6107123; doi:10.1371/journal.pntd.0006644), 2018-08-23

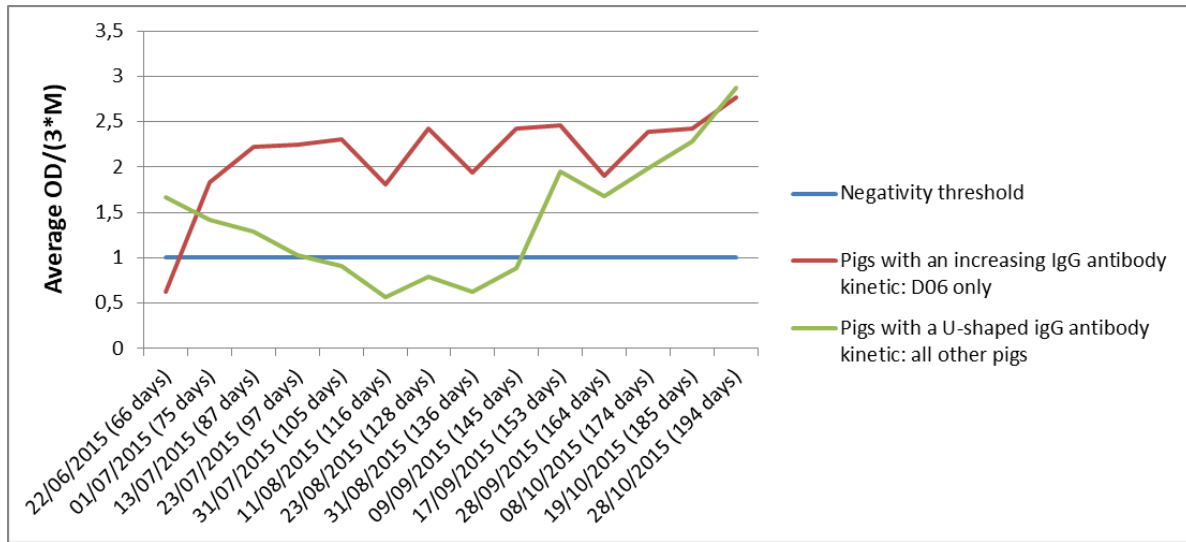

Supplement: pntd.0006644.s003.pdf [file pntd.0006644.s003.pdf]
