# Supplementary material for: Comparison of the dynamics of Japanese encephalitis virus circulation in sentinel pigs between a rural and a peri-urban setting in Cambodia
Source: PubMed Central journal article supplement (PMC6107123; doi:10.1371/journal.pntd.0006644), 2018-08-23
Supplement: pntd.0006644.s004.pdf [file pntd.0006644.s004.pdf]

| <b>Piglet ID</b> | <b>Age (days)</b> | <b>Sex</b> | <b>Farm</b> | <b>Sampling Date</b> | <b>Real Time RT-PCR (Ct value)</b> | <b>Conventional RT-PCR (NS3)</b> | <b>Virus isolation</b> | <b>Sequence (GenBank accession no)</b>        | <b>Genotype</b> |
|------------------|-------------------|------------|-------------|----------------------|------------------------------------|----------------------------------|------------------------|-----------------------------------------------|-----------------|
| C04              | 117               | Male       | Ta Khmau    | 10-Aug-15            | Pos (33.70)                        | Pos                              | Neg                    | Partial NS3 (KY927813)                        | GI-b            |
| C12              | 65                | Male       | Ta Khmau    | 19-Jun-15            | Pos (33.84)                        | Pos                              | Neg                    | Partial NS3 (KY927810)                        | GI-b            |
| C14              | 86                | Male       | Ta Khmau    | 10-Jul-15            | Pos (33.39)                        | Pos                              | Pos                    | Full genome (KY927817)                        | GI-b            |
| D03              | 145               | Female     | Kandal      | 09-Sep-15            | Pos (29.60)                        | Pos                              | Pos                    | Full genome (KY927818)                        | GI-b            |
| D08              | 145               | Female     | Kandal      | 09-Sep-15            | Pos (29.53)                        | Pos                              | Neg                    | Partial NS3 (KY927811)<br>Envelope (KY927814) | GI-b            |
| D15              | 174               | Male       | Kandal      | 08-Oct-15            | Pos (29.26)                        | Pos                              | Neg                    | Partial NS3 (KY927812)                        | GI-b            |
