# Supplementary material for: Comparison of the dynamics of Japanese encephalitis virus circulation in sentinel pigs between a rural and a peri-urban setting in Cambodia
Source: PubMed Central journal article supplement (PMC6107123; doi:10.1371/journal.pntd.0006644), 2018-08-23
Supplement: pntd.0006644.s005.pdf [file pntd.0006644.s005.pdf]

## A. July

|                                | Peri-urban |    |         |     |         |     |      | Rural   |    |         |    |         |    |      |
|--------------------------------|------------|----|---------|-----|---------|-----|------|---------|----|---------|----|---------|----|------|
|                                | Night 1    |    | Night 2 |     | Night 3 |     | Tot. | Night 1 |    | Night 2 |    | Night 3 |    | Tot. |
|                                | ♂          | ♀  | ♂       | ♀   | ♂       | ♀   |      | ♂       | ♀  | ♂       | ♀  | ♂       | ♀  |      |
| <i>Culex tritaeniorhynchus</i> | 0          | 8  | 1       | 80  | 0       | 45  | 134  | 0       | 14 | 2       | 20 | 0       | 19 | 55   |
| <i>Culex gelidus</i>           | 0          | 5  | 3       | 42  | 2       | 44  | 96   | 5       | 20 | 3       | 33 | 3       | 26 | 90   |
| <i>Culex vishnui</i>           | 2          | 5  | 1       | 35  | 0       | 14  | 57   | 1       | 4  | 0       | 17 | 0       | 25 | 47   |
| <i>Culex quinquefasciatus</i>  | 0          | 2  | 5       | 2   | 3       | 2   | 14   | 0       | 0  | 3       | 5  | 0       | 20 | 28   |
| <i>Culex sp.</i>               | 0          | 0  | 0       | 0   | 0       | 0   | 0    | 0       | 0  | 0       | 0  | 0       | 0  | 0    |
| Other                          | 2          | 0  | 1       | 0   | 0       | 0   | 3    | 0       | 1  | 0       | 1  | 0       | 2  | 4    |
| Total                          | 4          | 20 | 11      | 159 | 5       | 105 | 304  | 6       | 39 | 8       | 76 | 3       | 92 | 224  |

## B. August

|                                | Peri-urban |      |         |      |         |     |      | Rural   |     |         |     |         |      |      |
|--------------------------------|------------|------|---------|------|---------|-----|------|---------|-----|---------|-----|---------|------|------|
|                                | Night 1    |      | Night 2 |      | Night 3 |     | Tot. | Night 1 |     | Night 2 |     | Night 3 |      | Tot. |
|                                | ♂          | ♀    | ♂       | ♀    | ♂       | ♀   |      | ♂       | ♀   | ♂       | ♀   | ♂       | ♀    |      |
| <i>Culex tritaeniorhynchus</i> | 9          | 284  | 6       | 323  | 5       | 220 | 847  | 0       | 27  | 0       | 120 | 2       | 159  | 308  |
| <i>Culex gelidus</i>           | 12         | 372  | 23      | 510  | 10      | 256 | 1183 | 9       | 214 | 7       | 270 | 18      | 280  | 798  |
| <i>Culex vishnui</i>           | 15         | 395  | 10      | 494  | 8       | 324 | 1246 | 2       | 52  | 0       | 72  | 4       | 181  | 311  |
| <i>Culex quinquefasciatus</i>  | 15         | 1    | 3       | 0    | 7       | 6   | 32   | 10      | 6   | 0       | 0   | 4       | 1    | 21   |
| <i>Culex sp.</i>               | 0          | 0    | 0       | 0    | 0       | 24  | 24   | 0       | 0   | 0       | 0   | 4       | 735  | 739  |
| Other                          | 0          | 7    | 3       | 16   | 0       | 2   | 28   | 1       | 3   | 0       | 3   | 0       | 11   | 18   |
| Total                          | 51         | 1059 | 45      | 1343 | 30      | 832 | 3360 | 22      | 302 | 7       | 465 | 32      | 1367 | 2195 |

### C. September

|                                | Peri-urban |      |         |      |         |     |      | Rural   |      |         |     |         |     |      |
|--------------------------------|------------|------|---------|------|---------|-----|------|---------|------|---------|-----|---------|-----|------|
|                                | Night 1    |      | Night 2 |      | Night 3 |     | Tot. | Night 1 |      | Night 2 |     | Night 3 |     | Tot. |
|                                | ♂          | ♀    | ♂       | ♀    | ♂       | ♀   |      | ♂       | ♀    | ♂       | ♀   | ♂       | ♀   |      |
| <i>Culex tritaeniorhynchus</i> | 5          | 363  | 1       | 216  | 0       | 161 | 746  | 5       | 290  | 4       | 64  | 1       | 58  | 422  |
| <i>Culex gelidus</i>           | 74         | 489  | 33      | 669  | 26      | 362 | 1653 | 50      | 409  | 11      | 350 | 25      | 318 | 1163 |
| <i>Culex vishnui</i>           | 18         | 393  | 4       | 128  | 9       | 191 | 743  | 4       | 267  | 7       | 106 | 0       | 117 | 501  |
| <i>Culex quinquefasciatus</i>  | 1          | 0    | 0       | 0    | 4       | 0   | 5    | 21      | 7    | 4       | 8   | 0       | 3   | 43   |
| <i>Culex</i> sp.               | 0          | 0    | 11      | 349  | 0       | 2   | 362  | 0       | 0    | 16      | 270 | 7       | 84  | 377  |
| Other                          | 0          | 4    | 0       | 3    | 0       | 11  | 18   | 0       | 31   | 0       | 25  | 0       | 16  | 72   |
| Total                          | 98         | 1249 | 49      | 1365 | 39      | 727 | 3527 | 80      | 1004 | 42      | 823 | 33      | 596 | 2578 |

### D. October

|                                | Peri-urban |      |         |      |         |      |      | Rural   |     |         |     |         |     |      |
|--------------------------------|------------|------|---------|------|---------|------|------|---------|-----|---------|-----|---------|-----|------|
|                                | Night 1    |      | Night 2 |      | Night 3 |      | Tot. | Night 1 |     | Night 2 |     | Night 3 |     | Tot. |
|                                | ♂          | ♀    | ♂       | ♀    | ♂       | ♀    |      | ♂       | ♀   | ♂       | ♀   | ♂       | ♀   |      |
| <i>Culex tritaeniorhynchus</i> | 7          | 361  | 11      | 735  | 5       | 858  | 1977 | 0       | 67  | 0       | 24  | 0       | 52  | 143  |
| <i>Culex gelidus</i>           | 32         | 379  | 45      | 1072 | 42      | 1508 | 3078 | 2       | 92  | 0       | 62  | 2       | 126 | 284  |
| <i>Culex vishnui</i>           | 13         | 557  | 12      | 880  | 0       | 690  | 2152 | 0       | 186 | 0       | 26  | 0       | 117 | 329  |
| <i>Culex quinquefasciatus</i>  | 0          | 0    | 0       | 0    | 0       | 0    | 0    | 0       | 0   | 0       | 0   | 0       | 0   | 0    |
| <i>Culex</i> sp.               | 0          | 0    | 19      | 278  | 0       | 1312 | 1609 | 0       | 26  | 0       | 302 | 0       | 230 | 558  |
| Other                          | 1          | 6    | 7       | 53   | 6       | 58   | 131  | 0       | 49  | 0       | 37  | 0       | 24  | 110  |
| Total                          | 53         | 1303 | 94      | 3018 | 53      | 4426 | 8947 | 2       | 420 | 0       | 451 | 2       | 549 | 1424 |
