# Supplementary material for: Comparison of the dynamics of Japanese encephalitis virus circulation in sentinel pigs between a rural and a peri-urban setting in Cambodia
Source: PubMed Central journal article supplement (PMC6107123; doi:10.1371/journal.pntd.0006644), 2018-08-23
Supplement: pntd.0006644.s006.pdf [file pntd.0006644.s006.pdf]

| Serum ID | Date of Sampling | Province of Origin | IgG ELISA | ELISA DO | Result PRNT 50 JEV |     |
|----------|------------------|--------------------|-----------|----------|--------------------|-----|
| C150     | 14.02.06         | Kampong Cham       | Neg       | 0.056    | 0                  | Neg |
| C142     | 03.02.06         | Kampong Cham       | Neg       | 0.015    | 0                  | Neg |
| C9       | 02.02.06         | Kampong Cham       | Neg       | 0.025    | 0                  | Neg |
| C151     | 14.02.06         | Kampong Cham       | Neg       | 0.066    | 0                  | Neg |
| C371     | 20.02.06         | Kampong Cham       | Neg       | 0.003    | 0                  | Neg |
| C116     | 03.02.06         | Kampong Cham       | Neg       | NA       | 0                  | Neg |
| C24      | 02.02.06         | Kampong Cham       | Neg       | 0.042    | 0                  | Neg |
| C413     | 21.02.06         | Kampong Cham       | Neg       | 0.065    | 0                  | Neg |
| C1214062 | 14.12.07         | Takeo              | Neg       | 0.006    | 0                  | Neg |
| C1219091 | 19.12.07         | Pursat             | Neg       | 0.024    | 10                 | Neg |
| C305     | 20.02.06         | Kampong Cham       | Neg       | 0.068    | 15                 | Neg |
| C435     | 27.02.06         | Kampong Cham       | Pos       | 0.13     | 0                  | Neg |
| C205     | 14.02.06         | Kampong Cham       | Pos       | 0.149    | 0                  | Neg |
| C39      | 24.07.06         | Kampong Speu       | Pos       | 0.117    | 0                  | Neg |
| C363     | 20.02.06         | Kampong Cham       | Pos       | 0.208    | 0                  | Neg |
| C1205027 | 05.12.07         | Kandal             | Pos       | 0.229    | 147                | Pos |
| C163     | 14.02.06         | Kampong Cham       | Pos       | 0.211    | 0                  | Neg |
| C168     | 14.02.06         | Kampong Cham       | Pos       | 0.313    | 0                  | Neg |
| C1214067 | 14.12.07         | Kandal             | Pos       | 0.406    | 69.7               | Pos |
| C35      | 24.07.06         | Kampong Speu       | Pos       | 0.135    | 36                 | Pos |
| C140     | 03.02.06         | Kampong Cham       | Pos       | 0.325    | 98                 | Pos |
| C1212050 | 12.12.07         | Kampot             | Pos       | 0.203    | 253                | Pos |
| C1214067 | 14.12.07         | Kandal             | Pos       | 0.406    | 69.7               | Pos |
| C1205021 | 05.12.07         | Svay Rieng         | Pos       | 0.268    | 181                | Pos |
| C1205024 | 05.12.07         | Kandal             | Pos       | 0.326    | 67                 | Pos |
| C1212056 | 12.12.07         | Svay Rieng         | Pos       | 0.375    | 102                | Pos |
| C179     | 14.02.06         | Kampong Cham       | Pos       | 0.304    | 96                 | Pos |
| C183     | 14.02.06         | Kampong Cham       | Pos       | 0.189    | 328                | Pos |
| C216     | 14.02.06         | Kampong Cham       | Pos       | 0.188    | 559                | Pos |
| C1218079 | 18.12.07         | Kandal             | Pos       | 0.365    | 331                | Pos |
| C1220098 | 20.12.07         | Pursat             | Pos       | 0.303    | 253                | Pos |
| C1213057 | 13.12.07         | Kandal             | Pos       | 0.377    | 287                | Pos |
| C461     | 27.02.06         | Kampong Cham       | Pos       | 0.372    | 200                | Pos |
| C1206037 | 06.12.07         | Takeo              | Pos       | 0.226    | 496                | Pos |
| C1207038 | 07.12.07         | Takeo              | Pos       | 0.357    | 785                | Pos |
| C477     | 27.02.06         | Kampong Cham       | Pos       | 0.26     | 426                | Pos |
| C1218072 | 18.12.07         | Pursat             | Pos       | 0.333    | 255                | Pos |
